# Supplementary material
Source: PubMed Central journal article supplement (PMC7669583)

## Figure S1: Outline of Drug Administration and Urine Collections in Each Study

### Figure S1: Outline of Drug Administration and Urine Collections in Each Study

- A) NIDA:** Residential study that examined the utility of acetazolamide (ACZ) and Quinine as adherence markers (only ACZ data presented in this report) as well as their pharmacokinetic interaction with cocaine (CoC). Acetazolamide and creatinine content of urine was assessed from start of ACZ administration through to the end of the study.
- B) VAMC:** Outpatient ACZ study combined with human lab study to investigate the combined effects of doxazocin (Dox) and modafinil on cocaine self administration (Only ACZ data presented in this report). Acetazolamide was administered between days -18 to -1. Acetazolamide and creatinine content of urine was assessed from samples collected between days -18 and day 14 at home and during visits/inpatient stays.
- C) UKY:** Residential study that examined the utility of acetazolamide (ACZ) and Quinine as adherence markers (only ACZ data presented in this report) as well as their pharmacokinetic interaction with Oxycodone. In the first 4 participants ACZ content of urine was assessed between from start of ACZ administration (day -4) through day 1. For the last 6 participants ACZ content of urine was assessed from start of ACZ administration through to the end of the study (day 6).

**S1: Schematic Outline of Drug Administration and Urine Collections in Each Study**

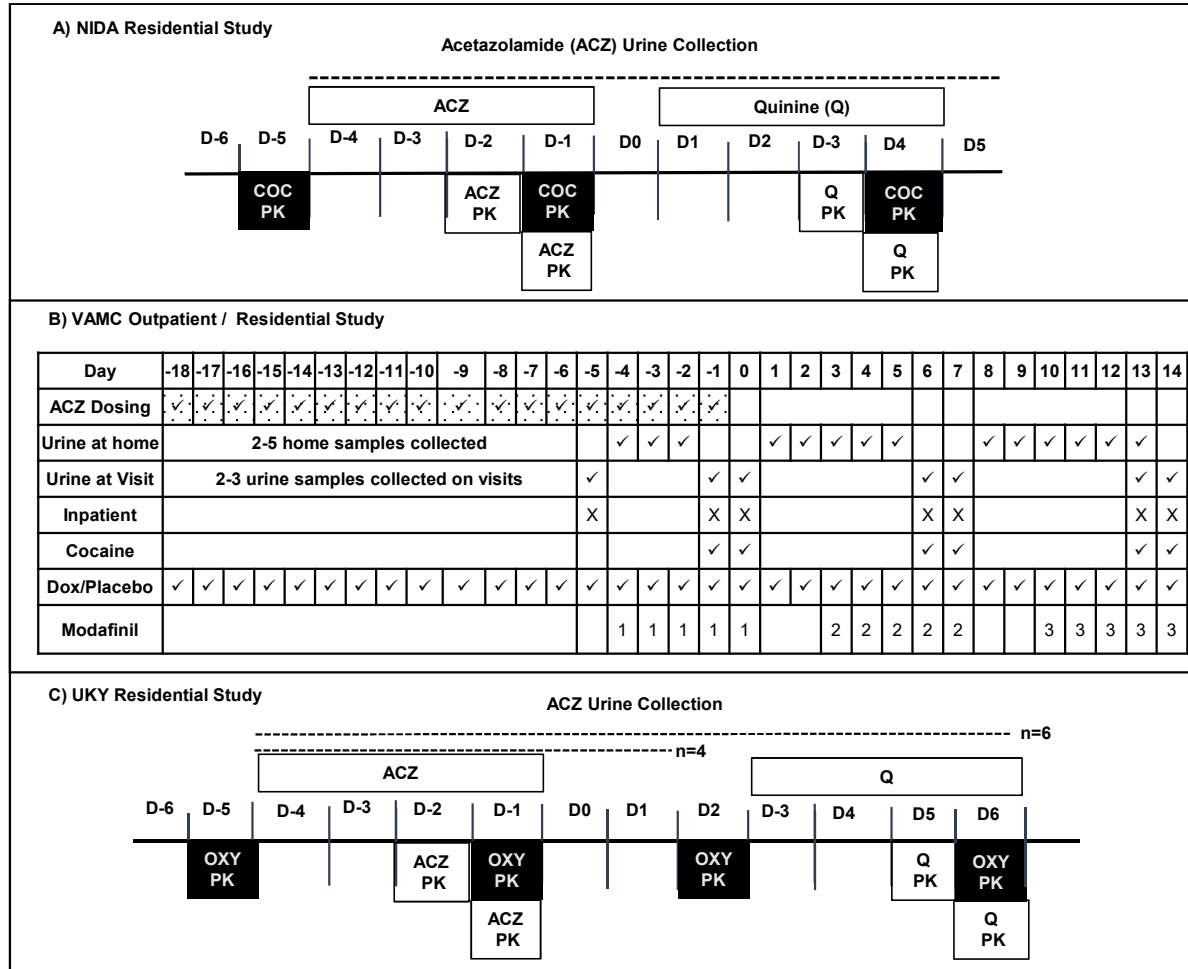

Supplement: NIHMS1604204-supplement-1.pdf [file NIHMS1604204-supplement-1.pdf]
